# Supplementary material for: Multifunctional wrinkled nacreous all-carbon films for high-performance stretchable strain sensors and supercapacitors
Source: Royal Society of Chemistry journal article supplement (doi:10.1039/d4ta02279c), 2024-01-01
Supplement: d4ta02279c1.pdf [file d4ta02279c1.pdf]

## Supporting information

# Multifunctional wrinkled nacreous all-carbon films for high-performance stretchable strain sensors and supercapacitors

*Soo-Hyeon Cho,<sup>1</sup> TaeGyeong Lim,<sup>2</sup> Hyeon-Jong Lee,<sup>2</sup> Sang-Yun Kim,<sup>2</sup> and Ji Won Suk<sup>1,2,3,\*</sup>*

<sup>1</sup> Department of Smart Fab. Technology, Sungkyunkwan University, Suwon 16419, Republic  
of Korea

<sup>2</sup> School of Mechanical Engineering, Sungkyunkwan University, Suwon, Gyeonggi-do  
16419, Republic of Korea

<sup>3</sup> SKKU Advanced Institute of Nanotechnology (SAINT), Sungkyunkwan University,  
Suwon, Gyeonggi-do 16419, Republic of Korea

\* Corresponding author. Tel: +82-31-290-7469. E-mail: [jwsuk@skku.edu](mailto:jwsuk@skku.edu) (J. W. Suk)

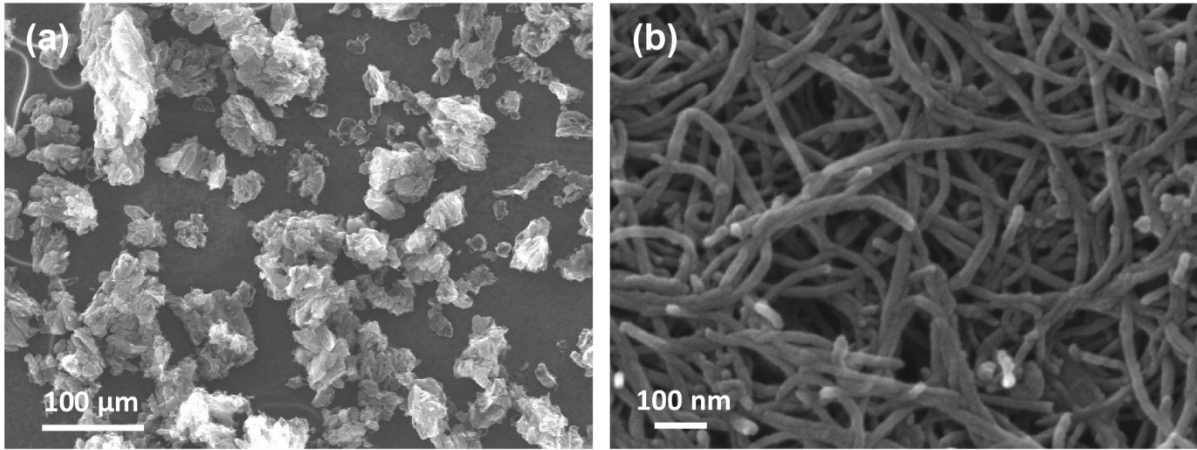

**Figure S1.** SEM images of (a) rGO powders and (b) MWCNTs.

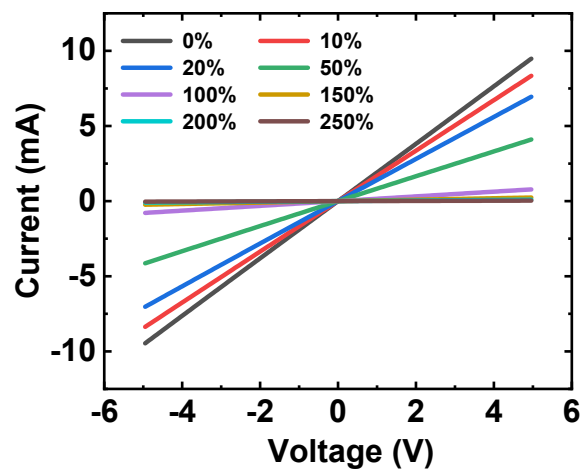

**Figure S2.** Current-voltage curves of the rGO/CNT film at various strains (50 wt.% rGO and 50 wt.% MWCNT).

**Table S1.** Comparison of the electrochemical performances of stretchable/flexible supercapacitors using graphene or CNTs as electrode materials.

| Electrode material                                 | Electrolyte                            | $C_A$<br>(mF/cm <sup>2</sup> ) | Voltage range (V) | Substrate       | Ref.*            |
|----------------------------------------------------|----------------------------------------|--------------------------------|-------------------|-----------------|------------------|
| <b>rGO/CNT</b>                                     | <b>PVA/H<sub>3</sub>PO<sub>4</sub></b> | <b>34</b>                      | <b>1</b>          | <b>VHB film</b> | <b>This work</b> |
| Ti <sub>3</sub> C <sub>2</sub> T <sub>x</sub> /RGO | PVA/H <sub>2</sub> SO <sub>4</sub>     | 17                             | 0.4               | VHB film        | [49]             |
| MXene/Carbon black/alginate                        | PVA/Li <sub>2</sub> SO <sub>4</sub>    | 10                             | 1                 | VHB film        | [49, 50]         |
| CNT forest                                         | PVA/KCl                                | 5                              | 0.8               | VHB film        | [51]             |
| NCNT array                                         | PVA/H <sub>3</sub> PO <sub>4</sub>     | 31                             | 1                 | PU film         | [52]             |
| PANI/Graphene woven fabric                         | PVA/H <sub>3</sub> PO <sub>4</sub>     | 8                              | 1                 | PDMS            | [53]             |
| Interwoven CNT                                     | PVA/KOH                                | 0.3                            | 0.8               | PDMS            | [54]             |
| RGO/PANI                                           | PVA/H <sub>2</sub> SO <sub>4</sub>     | 36                             | 0.8               | Parylene film   | [55]             |
| N-doped bernal graphene                            | PVA/NaClO <sub>4</sub>                 | 26.75                          | 0.8               | Ag/PET          | [56]             |
| MoO <sub>3</sub> /CNT                              | PVA/KOH                                | 28                             | 1                 | PDMS            | [57]             |
| MWCNT/fabric                                       | PVA/KOH                                | 4.17                           | 1                 | fabric          | [58]             |

\*References shown in the main text
